# Supplementary material for: Activating Transcription Factor 3 Based Early Alarm Model of Acute Kidney Injury after Cardiopulmonary Bypass in Adults
Source: Hindawi journal article supplement (doi:10.1155/2022/8076718), 2022-10-11
Supplement: f1 [file 8076718.f1.doc]

Supplementary TABLE 1: Patients’ characteristics at baseline

| **Variables** | **non-AKI** | **AKI** | **P** |
| --- | --- | --- | --- |
| **AKI** | 41 (40.40%) | 42 (50.60%) |  |
| **Characteristics** |  |  |  |
| -Male (n,%) | 28 (68.29%) | 20 (47.62%) | 0.06 |
| -Age (yr) | 58.12±10.36 | 62.76±10.18 | 0.02 |
| -Height (cm) | 166.61±7.70 | 161.57±7.01 | 0.003 |
| -Body weight (kg) | 67.74±11.82 | 64.14±11.95 | 0.08 |
| -Hypertension (n,%) | 8 (19.51%) | 7 (16.67%) | 0.74 |
| -Diabetes mellitus (n,%) | 19 (46.34%) | 21 (51.22%) | 0.66 |
| -LVEF (%) | 58.63±8.38 | 58.48±8.50 | 0.71 |
| -eGFR(ml/min) | 89.39±26.27 | 78.96±27.04 | 0.07 |
| **Pre-operative examination** |  |  |  |
| -WBC (×109/L) | 6.65±2.02 | 6.13±1.74 | 0.21 |
| -RBC (×1012/L) | 4.47±0.44 | 4.35±0.62 | 0.36 |
| -Hb (g/L) | 159.24±157.64 | 127.76±18.12 | 0.04 |
| -PLT (×109/L) | 232.20±160.52 | 188.45±54.19 | 0.10 |
| -ALT (U/L) | 31.84±21.34 | 24.19±15.35 | 0.04 |
| -AST (U/L) | 30.23±21.20 | 30.40±20.94 | 0.88 |
| -ALB (g/L) | 41.78±4.18 | 41.27±4.43 | 0.59 |
| -Conjugated bilirubin (μmol/L) | 5.61±3.66 | 5.71±3.50 | 0.76 |
| -Unconjugated bilirubin (μmol/L) | 8.14±6.73 | 8.24±7.10 | 0.91 |
| -Creatinine (μmol/L) | 76.43±18.07 | 75.07±17.71 | 0.73 |
| -Uric acid (μmol/L) | 348.12±106.34 | 360.71±93.60 | 0.58 |
| -Blood urea nitrogen(mmol/L) | 5.35±1.59 | 5.95±1.58 | 0.04 |
| **Surgery related information** |  |  |  |
| -Coronary artery bypass grafting (n,%) | 21 (51.22) | 13 (30.95) | 0.06 |
| -Coronary artery bypass grafting + valve surgery (n,%) | 0 (0.00) | 3 (7.14) | 0.25 |
| -Single valve replacement (n,%) | 14 (34.15) | 15 (35.71) | 0.94 |
| -Dual valve replacement (n,%) | 3 (7.32) | 7 (16.67) | 0.33 |
| -Major vascular surgery (n,%) | 0 (0.00) | 2 (4.76) | 0.49 |
| -Others (surgery for atrial septal defect, surgery for tumors, ablation for atrial fibrillation, etc) (n,%) | 2 (4.88) | 3 (7.14) | 1.00 |
| **CPB related information** |  |  |  |
| -Total time (min) | 92.88±27.18 | 102.21±39.78 | 0.61 |
| -Cardiac arrest (n,%) | 21(51.22%) | 27(64.29%) | 0.23 |
| -Time of clamping (min) | 30.66±32.68 | 43.55±38.22 | 0.12 |
| -Intra-operative RBC (U) | 0.78±1.39 | 1.33±2.10 | 0.18 |
| -Intra-operative plasma (ml) | 158.54±239.77 | 219.19±271.50 | 0.22 |
| -Intra-operative platelet (n,%) | 0 (0.00) | 2 (4.76%) | 0.49 |
| **Examinations on the day of surgery** |  |  |  |
| -WBC (×109/L) | 15.00±5.26 | 15.05±6.03 | 0.97 |
| -RBC (×1012/L) | 3.41±0.36 | 5.66±14.60 | 0.95 |
| -Hb (g/L) | 103.4±69.48 | 101.26±12.28 | 0.36 |
| -PLT (×109/L) | 159.83±1.77 | 133.40±42.69 | 0.01 |
| -ALT (U/L) | 48.41±23.86 | 46.09±31.81 | 0.28 |
| -AST (U/L) | 54.54 ±20.81 | 66.83 ±44.28 | 0.30 |
| -ALB (g/L) | 28.51 ±3.41 | 29.10 ±3.24 | 0.43 |
| -Conjugated bilirubin (μmol/L) | 2.27±0.63 | 2.40±0.50 | 0.12 |
| -Unconjugated bilirubin (μmol/L) | 13.90±6.96 | 16.12±8.31 | 0.11 |
| -Creatinine (μmol/L) | 74.11±18.95 | 81.73±20.18 | 0.07 |
| -Uric acid (μmol/L) | 292.14±102.84 | 321.95±97.42 | 0.18 |
| -Blood urea nitrogen (mmol/L) | 12.69±42.46 | 7.52±2.49 | 0.01 |
| **ICU related information** |  |  |  |
| -ICU stay (h) | 71.78±57.32 | 77.71±72.42 | 0.20 |
| -Invasive ventilation (h) | 27.17±43.59 | 28.10±70.82 | 0.37 |
| -IS on the day of surgery | 8.33±4.58 | 9.04±5.19 | 0.62 |
| -IS at 1 day after surgery | 8.43±6.19 | 8.38±4.81 | 0.69 |
| -IS at 2 days after surgery | 7.91±9.61 | 6.65±4.08 | 0.57 |
| -Death (n,%) | 2 (4.88%) | 1 (2.38%) | 1.00 |
| -CRRT (n,%) | 1 (2.38%) | 1 (2.38%) | 1.00 |

Notes: CRRT: continuous renal replacement therapy, Hb: hemoglobin, ICU: intensive care unit, IS: positive inotropic drug score (positive inotropic drug index = dopamine dosage+dobutamine dosage+100epinephrine dosage+100norepinephrine dosage + 100isoproterenol dosage+15milrinone dosage. The unit of drug concentration is μg/(kg·min)). LVEF: left ventricular ejection fraction, PLT: platelets, RBC: red blood cells, WBC: white blood cells.
